1 **TITLE:** Balances: a new perspective for microbiome analysis

2 **RUNNING TITLE:** Balances for microbiome analysis

3 **AUTHORS:**

4 *J. Rivera-Pinto<sup>1,2</sup>, J.J. Egozcue<sup>3</sup>, V. Pawlowsky – Glahn<sup>4</sup>, R. Paredes<sup>1,2,5,6</sup>,*

5 *\* M. Noguera-Julian<sup>1,2,5</sup>, \* M. L. Calle<sup>2</sup>*

6

7 <sup>1</sup>**irsiCaixa AIDS Research Institute, Badalona (Spain)**

8 <sup>2</sup>**Universitat de Vic – Universitat Central de Catalunya, Vic (Spain)**

9 <sup>3</sup>**Universitat Politècnica de Catalunya, Barcelona (Spain)**

10 <sup>4</sup>**Universitat de Girona, Girona (Spain)**

11 <sup>5</sup>**Universitat Autònoma de Barcelona, Barcelona (Spain)**

12 <sup>6</sup>**HIV Unit & Lluita Contra la SIDA Foundation, Badalona (Spain)**

13

14 \*Contributed equally to this work

15

16 **Corresponding author:** M. Noguera-Julian (mnoguera@irsicaixa.es)

17 **Word count:**

18 **Abstract:** 158

19 **Text:** 3369

20 **ABSTRACT**

21

22 High-throughput sequencing technologies have revolutionized microbiome research by  
23 allowing the relative quantification of microbiome composition and function in different  
24 environments. One of the main goals in microbiome analysis is the identification of  
25 microbial species that are differentially abundant among groups of samples, or whose  
26 abundance is associated with a variable of interest. Most available methods for microbiome  
27 abundance testing perform univariate tests for each microbial species or taxa separately,  
28 ignoring the compositional nature of microbiome data.

29 We propose an alternative approach for microbiome abundance testing that consists on the  
30 identification of two groups of taxa whose relative abundance, or balance, is associated  
31 with the response variable of interest. This approach is appealing, since it has direct  
32 translation to the biological concept of ecological balance between species in an ecosystem.  
33 In this work, we present *selbal*, a greedy stepwise algorithm for balance selection.

34 We illustrate the algorithm with 16s abundance data from an HIV-microbiome study and a  
35 Crohn-microbiome study.

36

37

38 **Importance**

39 A more meaningful approach for microbiome abundance testing is presented. Instead of  
40 testing each taxon separately we propose to explore abundance balances among groups of  
41 taxa. This approach acknowledges the compositional nature of microbiome data.

42 **INTRODUCTION**

43

44 Human microbiome research, focused on understanding the role in health and disease of  
45 microbes living in the human body, has experienced significant growth in the last few years.

46 High-throughput sequencing technologies have revolutionized this field by allowing the  
47 quantification of microbiome composition and function in different environments. Large  
48 scale projects, like the Human Microbiome Project (1)(2) or MetaHIT (Metagenomics of the  
49 Human Intestinal Tract), have established standardized protocols for creating, processing  
50 and interpreting metagenomic data (3). However, the analysis of microbiome data for  
51 differential abundance or association with sample metadata is still challenging.

52

53 Typically, after DNA sequencing, bioinformatics preprocessing and quality control of the  
54 sequences, an abundance table with the number of sequences (*reads*) per sample for  
55 different microbial species (*taxa*) is obtained. Total number of sequences for each sample  
56 is highly variable, and depends on laboratory sample preparation. Indeed, raw abundances  
57 and the total number of reads per sample are non-informative since they depend on  
58 physical and technical mechanisms when sequencing the DNA. In order to mitigate the  
59 problem of different sampling depth, microbiome data are often normalized previous to  
60 differential abundance testing (4)(5).

61

62 Working with proportions, that is, relative abundances instead of raw abundances, does not  
63 solve the problem since there is a dependence structure in the data that may lead to  
64 misleading results such as spurious correlations or incoherent distances (6)(7).

65 Rarefaction, which consists of random sampling of the same number of sequences for each  
66 sample, is similar to working with relative abundances. Though rarefaction might be  
67 convenient for richness and diversity analyses and avoids the problem of different sample  
68 depth, it supposes a loss of information and the increase of Type I error for differential  
69 abundance analyses (4). Other normalization alternatives, developed for RNA-Seq, are also  
70 applied in microbiome analysis for dealing with the problem of different number of counts  
71 per sample through variance stabilizing transformations (5). However, these RNA-Seq  
72 proposals also present problems with the false discovery rate when library sizes are very  
73 different among samples (8).

74

75 An alternative approach to rarefaction and normalization methods for microbiome analysis  
76 is to acknowledge the compositional nature of microbiome data and to use the  
77 mathematical theory available for compositional data (CoDa). Compositional data is defined  
78 as a vector of strictly positive real numbers carrying relative information. Relative  
79 information refers to the fact that the information of interest is contained in the ratios  
80 between the components of the composition and the numerical value of each component  
81 by itself is irrelevant (9).

82 As mentioned before, raw microbiome abundances are by itself non-informative since they  
83 depend on technical artifacts such as sequencing depth. Thus, microbiome data fits the

84 definition of compositional data except for the fact that microbiome abundance tables  
85 contain many zeros. Assuming that observed zeros are rounded zeros, meaning that they  
86 correspond to values below the detection limit, they can be replaced by a positive value or  
87 pseudo count (10) so that CoDa analysis in terms of relative abundances between groups of  
88 microorganisms can be applied.

89

90 Several recent works acknowledge the compositional nature of microbiome abundance  
91 data and propose their analysis accordingly (11,12). Most of these approaches consider the  
92 *centered log-ratio transformation* (clr) and perform relative abundance testing for each clr  
93 transformed component, which is given by the logarithm of the component divided by the  
94 geometric mean of all the components in the sample. This allows the identification of clr  
95 transformed components that are associated with a specific characteristic of interest.  
96 However, the interpretation of such association is not straightforward because the clr  
97 transformation involves the abundances of all the taxa in the sample.

98 Instead, we propose to perform microbiome relative abundance testing by identifying two  
99 groups of taxa whose relative abundance is associated with the phenotype of interest. For  
100 this we use the notion of balance between two groups of components of a composition,  
101 which is a central concept in CoDa analysis.

102

103 Mathematically, a balance is defined as follows. Let  $X = (X_1, X_2, \dots, X_k)$  be a composition  
104 of the number of counts for  $k$  different microbial species or taxa. Given two disjoint subsets

105 of components in  $X$ , denoted by  $X_+$  and  $X_-$ , indexed by  $I_+$  and  $I_-$ , and composed by  $k_+$  and  
106  $k_-$  taxa, respectively, the balance between  $X_+$  and  $X_-$  is defined as:

107

$$108 \quad B = \sqrt{\frac{k_+ \cdot k_-}{k_+ + k_-}} \log \frac{(\prod_{i \in I_+} X_i)^{1/k_+}}{(\prod_{j \in I_-} X_j)^{1/k_-}} .$$

109

110 Expanding the logarithm, the balance is proportional to

111

$$112 \quad B \propto \frac{1}{k_+} \sum_{i \in I_+} \log X_i - \frac{1}{k_-} \sum_{j \in I_-} \log X_j ,$$

113

114 which is a more familiar expression corresponding to the difference in means of the log-  
115 transformed abundances between the two groups.

116 Balances are in compositional data analysis a key element in the construction of new  
117 coordinates through the so called *isometric log-ratio transformation* (ilr) (13) .

118

119 The concept of balance, as proposed in the compositional data theory, provides a new and  
120 interesting perspective for microbiome data analysis, since this mathematical concept is  
121 related to the biological concept of ecological balance in ecosystems.

122

123 Recently, some authors have proposed the use of CoDa approaches for microbiome analysis  
124 with different objectives such as the differential abundance between groups (14),

125 differentiation of niches (15), or the inclusion of phylogenetic associations between the  
126 components included in the study (16).

127

128 In this work, we propose an algorithm for the identification of balances between groups of  
129 taxa that are associated with a dependent component of interest. This approach provides a  
130 new perspective to differential abundance and microbiome association studies. Starting  
131 with the balance composed by only two taxa that is most associated with the response, the  
132 algorithm performs a forward selection process and, at each step, a new taxon is added to  
133 the existing balance so that the specified association criterion is maximized. The algorithm  
134 stops when none of the possible additions improves the current association.

135

136 The paper is organized as follows. In the Results and Discussion section, the proposed  
137 algorithm is applied to an HIV-microbiome study and to a Crohn's disease-microbiome  
138 study. Then these results are analyzed and both the advantages and technical issues of the  
139 algorithm when applied to microbiome data sets are discussed. Finally, in Material and  
140 Methods we present a detailed explanation of the algorithm.

141

142 **RESULTS**

143 We illustrate the proposed methodology with a dataset from a cross – sectional HIV –  
144 microbiome study conducted in Barcelona (Spain) including both HIV – infected subjects  
145 and HIV – negative controls (17). Microbiome information is derived from MiSeq™ 16SrRNA  
146 sequence and bioinformatically processed with Mothur. After applying abundance filters  
147 and agglomerating taxa to genus level, microbiome abundance is summarized in a matrix of  
148 raw abundances for 155 samples and 60 different genera (Bioproject accession number:  
149 PRJNA307231, SRA accession number: SRP068240). Below, we present the results for two  
150 different analyses, the association of microbiome abundance with HIV status and with the  
151 inflammation parameter, sCD14. In the first case, the component of interest is dichotomous  
152 while in the second case it is continuous.

153

154 We also present the results of a Crohn’s disease study (18). Only patients with Crohn’s  
155 disease ( $n = 662$ ) and those without any symptom ( $n = 313$ ) were analyzed. The information  
156 was obtained from MiSeq™ 16SrRNA sequence, agglomerated to the genus level, resulting  
157 in a matrix with information of 48 genus for 975 samples. In this case, the goal is to identify  
158 groups of taxa whose abundance balance is associated with Crohn’s disease.

159

160 ***Microbiome and HIV status***

161 The main goal of this analysis is to find a microbiome balance associated with HIV-status,  
162 that is, a microbiome balance that is able to discriminate between HIV-positive and HIV-  
163 negative individuals. As exposed in Noguera–Julian et al. (17), the HIV risk factor MSM (Men



164 who have Sex with Men) vs non-MSM should be considered as a possible confounder in any  
165 HIV - microbiome study. The proposed algorithm implements a regression model which  
166 allows adjustment for other variables. Thus, we applied the algorithm to  $Y$ =HIV-status and  
167  $X$ =microbiome abundance at genus level, adjusted by  $Z$ =MSM factor.

168

169 According to the cross-validation (cv) procedure implemented with function *selbal.cv*, the  
170 optimal number of components to be included in the balance is 2 (Figure 1). The balance  
171 we identified as the most associated with HIV-status is given by  $X_+$ , a taxon of the family  
172 *Erysipelotrichaceae* and unknown genus and  $X_-$ , a taxon of the family *Ruminococcaceae*  
173 and unknown genus (Figure 2). HIV-positive status is associated with higher balance scores,  
174 that is, larger relative abundances of *Erysipelotrichaceae* with respect to *Ruminococcaceae*.  
175 The discrimination accuracy of this balance is moderate, with an AUC of 0.786 on the whole  
176 sample and a cross-validation AUC of 0.674. As can be observed in the boxplot in Figure 2,  
177 HIV-negative individuals are associated with lower balance values, most of them negative,  
178 while HIV-positive individuals have heterogeneous balance values. Figure 3 shows the result  
179 of the cross – validation procedure. The balance identified with the whole dataset is the  
180 most frequently identified in the cross-validation procedure, appearing 44% of the times,  
181 an indicator of robustness for the proposed global balance.

182

183 ***Microbiome and sCD14 inflammation parameter***

184

185 Acute and chronic inflammations typically occur after HIV infection. Even patients under  
186 antiretroviral medications and undetectable viral load present chronic inflammation, which  
187 may cause tissue damage and is associated with many chronic diseases. In this context,  
188 there is a great interest in defining possible interventions involving modifications of the gut  
189 bacterial environment, which may reduce inflammation in HIV patients. This requires a good  
190 understanding of the association between gut microbial composition and several  
191 inflammation parameters. In this case, we focus on an immune–marker related to the  
192 chronic inflammation: the levels of soluble CD14 (sCD14), which was measured for a subset  
193 of samples ( $n = 151$ ). The optimal number of components to be included in the model is  
194 four, according to the cv-MSE (Figure 4). The balance that is identified as the most  
195 associated with sCD14 is composed by two taxa in the numerator,  $X_+ =$   
196  $\{g\_Subdoligranulum, f\_Lachnospiraceae\_g\_unclassified\}$  and two in the denominator  $X_- =$   
197  $\{f\_Lachnospiraceae\_g\_Intertae\_Sedis, g\_Collinsella\}$ . The association is moderate, with  $R =$   
198 0.53. Figure 5 provides a scatter plot of the balance values and sCD14 values, indicating  
199 that higher balance scores are associated with higher sCD14 values. The robustness of the  
200 selected balance can be evaluated through the results of the cv-procedure (Figure 6). We  
201 see that the proposed global balance is also the one that has been more frequently selected  
202 in the cv, 34% of the times. The four taxa defining the global balance correspond to the top  
203 4 most frequently selected in the cross - validation. These results emphasize the robustness  
204 of the selected global balance.

205

206 ***Crohn's disease***

207

208 Crohn's disease is an inflammatory bowel disease (IBD) linked to microbial alterations in the  
209 gut (18)(19). We ran *selbal.cv* algorithm with the goal of identifying groups of taxa whose  
210 abundance balance can discriminate between individuals with Crohn's disease from those  
211 without the disease.

212 The optimal number of components in the balance is twelve according to the MSE criterion  
213 (Figure 7). The groups defining the balance are  $X_+ = \{g\_Roseburia, o\_Clostridiales\_g\_,$   
214  $g\_Bacteroides, f\_Peptostreptococcaceae\_g\_ \}$  and  $X_- = \{g\_Dialister, g\_Dorea,$   
215  $o\_Lactobacillales\_g\_ , g\_Eggerthella, g\_Aggregatibacter, g\_Adlercreutzia, g\_Streptococcus,$   
216  $g\_Oscillospira\}$ . Cases with Crohn's disease have lower balance scores than controls (Figure  
217 8) which means lower relative abundances of  $X_+$  with respect to  $X_-$ . The discrimination  
218 value of the identified balance is important, with an AUC = 0.838 and a cv-AUC = 0.819.

219 The identified global balance is very robust as the results of the cv reveal (Figure 9). The  
220 global balance obtained with the whole dataset is also the most frequently identified  
221 balance in the cv-procedure, namely 36% of the times. Moreover, the components defining  
222 the global balance are also the ones more frequently selected in the cv procedure. The  
223 balance identifies *Bacteroides* and *Clostridiales* as part of the denominator of the balance,  
224 which have also been identified previously as less abundant in Crohn's disease individuals  
225 than in controls (18).

226

227

228

229 **DISCUSSION**

230 The identification of individual microbial species, or taxa, that are differentially abundant  
231 among groups of samples is challenging because the change in relative abundance of one  
232 taxon affects the relative abundances of the other taxa. As an alternative, we propose the  
233 analysis of relative abundances among groups of taxa instead of analyzing each taxon  
234 separately. In this work, we present *selbal*, a greedy stepwise algorithm for balance  
235 selection that takes into account the compositional nature of microbiome abundance data.  
236 The algorithm identifies two groups of taxa whose relative abundance, or balance, is  
237 associated with the response variable of interest.

238

239 *selbal* overcomes the problem of differences in sample size that is usually treated with  
240 different methods based on count-normalization, rarefaction or transformation into  
241 proportions. The only way in which data is altered in *selbal* is at the zero imputation stage  
242 required because of the use of logarithms and ratios in the definition of balances. This  
243 replacement of zeros by positive numbers is performed under the assumption that  
244 observed zeros are rounded zeros, that is, all taxa are present in all the samples but some  
245 of them are not detected because of low abundance and insufficient sample depth.  
246 However, it is not clear how the imputation method and the presence of structural zeros  
247 (absence of the taxa in the sample) may influence the results. Future research will be  
248 focused on the treatment of zeros with the aim of more precisely evaluating if zeros are  
249 rounded or structural and on selecting the best replacement method.

250

251 Due to the computational cost, *selbal* does not explore the whole balance space and the  
252 method for selecting the optimal balance is suboptimal and may be improved. Thus,  
253 exploring for alternative approaches in the search of the optimal balance is another topic  
254 of future research.

255

256 In order to improve classification or prediction accuracy of the variable of interest a  
257 prediction model with several balances can be obtained by applying *selbal* algorithm  
258 sequentially. This sequential search of balances can be performed similarly to partial least  
259 squares approach: when the first balance B1 is identified, all variables are deflated by the  
260 first balance, that is, each variables is adjusted for the first balance, by regressing the  
261 variable on B1 and taking residuals. Then, the second balance is searched on the new  
262 orthogonalized data.

263

264 Endorsed by the compositional treatment of microbiome abundance data, *selbal* can also  
265 be useful for comparing different microbial studies. Since balances are based on relative  
266 abundances among groups of taxa, this relative information is likely to remove the noise  
267 and biases of each particular study.

268

269

270 **MATERIALS AND METHODS**

271

272 Let  $X = (X_1, X_2, \dots, X_k)$  be a composition, that is, a vector of strictly positive real numbers.

273 Given two disjoint subsets of components in  $X$ , denoted by  $X_+$  and  $X_-$ , indexed by  $I_+$

274 and  $I_-$ , composed by  $k_+$  and  $k_-$  components respectively, the balance between  $X_+$  and  $X_-$

275 is defined as:

276

277 
$$B(X_+, X_-) = \sqrt{\frac{k_+ \cdot k_-}{k_+ + k_-}} \log \frac{(\prod_{i \in I_+} X_i)^{1/k_+}}{(\prod_{j \in I_-} X_j)^{1/k_-}} .$$

278

279 Expanding the logarithm, the balance is proportional to

280

281 
$$B(X_+, X_-) \propto \frac{1}{k_+} \sum_{i \in I_+} \log X_i - \frac{1}{k_-} \sum_{j \in I_-} \log X_j = M_+ - M_- ,$$

282

283 which corresponds to the difference of the arithmetic means of the log-transformed initial

284 components in the two groups that we denote by  $M_+$  and  $M_-$ , respectively. This second

285 expression is preferable from a computational point of view and is the one implemented in

286 the proposed algorithm.

287 Given  $Y$ , a response variable, which can be either numeric or dichotomous, a composition

288  $X = (X_1, X_2, \dots, X_k)$  and additional covariates  $Z = (Z_1, Z_2, \dots, Z_r)$ , the goal of the algorithm

289 is to determine the sub-compositions of  $X$ ,  $X_+$  and  $X_-$ , indexed by  $I_+$  and  $I_-$ , respectively,

290 so that the balance  $B$  between  $X_+$  and  $X_-$  is highly associated with  $Y$  after adjustment for

291 covariates  $Z$ . Depending on the nature of the dependent variable, the association can be  
292 defined in several ways.

293 For a continuous variable  $Y$ , the optimization criterion is defined as maximization of the  
294 coefficient of determination of the linear regression model:

295

$$296 \quad Y = \beta_0 + \beta_1 B + \gamma' Z .$$

297

298 For a dichotomous variable  $Y$ , we fit the logistic regression model

299

$$300 \quad \text{logit}(Y) = \beta_0 + \beta_1 B + \gamma' Z ,$$

301

302 and, in this case, we consider three possible optimization criteria: the area under the ROC  
303 curve (default option), the maximization of the explained variance (20) or the discrimination  
304 coefficient (21).

305

306 The main function of the proposed algorithm to detect the most associated balance is called  
307 *selbal* and follows these steps:

308

309 **STEP 0: Zero replacement**

310

311 The initial matrix of counts in a microbiome study, denoted by  $\tilde{X}$ , typically contains zeros.

312 In order to apply the mathematical theory of compositional data, the observed zeros are

313 assumed to be non-structural zeros but a consequence of under detection limit. They are  
314 replaced by a positive value using a Bayesian-Multiplicative replacement (10) of count zeros  
315 as implemented in function *cmultRep()* of the R package *zCompositions* (22). It is important  
316 to remark that this transformation keeps the information contained in the ratios between  
317 non-zero components. The resulting matrix without zeros is denoted by  $\mathbf{X}$  and coincides  
318 with  $\tilde{\mathbf{X}}$  only if the latter has no null value.

319

320

321 **STEP 1: Optimal balance between two components**

322

323 The algorithm evaluates exhaustively the optimization criterion for all possible balances  
324 composed by only two components; that is, all the balances of the form:

325 
$$B = \sqrt{\frac{1}{2}} (\log(X_i) - \log(X_j))$$

326 for  $i, j \in \{1, \dots, k\}$   $i \neq j$ . We denote by  $B^{(1)}$  the optimal two- component balance in  
327 terms of maximization of the association value.

328 For each pair of components  $(X_i, X_j)$  there are two options when defining a balance:

329 
$$\sqrt{\frac{1}{2}} (\log(X_i) - \log(X_j)) \quad \text{and} \quad \sqrt{\frac{1}{2}} (\log(X_j) - \log(X_i))$$

330 differenced only by their sign. For dichotomous variables, they will provide the same AUC  
331 value; nevertheless *selbal* returns the balance whose coefficient in the regression model is  
332 positive.

333



334

335 **STEP s:** *Optimal balance adding a new component*

336

337 For  $s > 1$  and until the stop criterion is fulfilled, let  $B^{(s-1)}$  be

338

$$339 \quad B^{(s-1)} \propto M_+^{(s-1)} - M_-^{(s-1)} = \frac{1}{k_+^{(s-1)}} \sum_{i \in I_+^{(s-1)}} \log(X_i) - \frac{1}{k_-^{(s-1)}} \sum_{j \in I_-^{(s-1)}} \log(X_j)$$

340 where  $I_+^{(s-1)}$  and  $I_-^{(s-1)}$  are two disjoint subsets of indices in  $\{1, \dots, k\}$ , with  $k_+^{(s-1)}$  and

341  $k_-^{(s-1)}$  elements, respectively.

342 For each index  $p \notin (I_+^{(s-1)} \cup I_-^{(s-1)})$ , the algorithm evaluates the optimization criterion

343 of the balance that is obtained by adding  $\log(X_p)$  to  $B^{(s-1)}$  including  $p$  either in  $I_+^{(s-1)}$  or

344 in  $I_-^{(s-1)}$ . That is, the algorithm evaluates the optimization criterion for both,  $B^{(s+)}$

345 and  $B^{(s-)}$ , defined as:

346

$$347 \quad B^{(s+)} = \sqrt{\frac{(k_+^{(s-1)} + 1) \cdot k_-^{(s-1)}}{k_+^{(s-1)} + k_-^{(s-1)} + 1}} \left( \frac{k_+^{(s-1)} * M_+^{(s-1)} + \log(X_p)}{k_+^{(s-1)} + 1} - M_-^{(s-1)} \right),$$

348

$$349 \quad B^{(s-)} = \sqrt{\frac{k_+^{(s-1)} * (k_-^{(s-1)} + 1)}{k_+^{(s-1)} + k_-^{(s-1)} + 1}} \left( M_+^{(s-1)} - \frac{k_-^{(s-1)} * M_-^{(s-1)} + \log(X_p)}{k_-^{(s-1)} + 1} \right),$$

350

351 and selects as  $B^{(s)}$  the one that maximizes the optimization criterion. If  $B^{(s)} = B^{(s+)}$ , the  
352 sets of new indices are defined as,  $I_+^{(s)} = I_+^{(s-1)} \cup \{p\}$  and  $I_-^{(s)} = I_-^{(s-1)}$ , and similarly  
353 for  $B^{(s)} = B^{(s-)}$ .

354

355

356 **STOP criterion.** *selbal* function has two parameters to decide the stopping criterion:

357

358 - *th.imp*, threshold improvement (default 0). The algorithm stops the iteration  
359 process when the improvement in association is lower than the specified threshold  
360 improvement.

361 - *maxV*, maximum number of components. The algorithm stops when the specified  
362 maximum number of components has been included in the balance.

363

364 **Cross-validation: *selbal.cv***

365

366 We perform a cross-validation procedure with two goals: (1) to identify the optimal number  
367 of components to be included in the balance and (2) to explore the robustness of the global  
368 balance identified with the whole dataset.

369 The cv procedure is implemented in the *selbal.cv* function.

370 For each cv process, the dataset is divided into K folds (default value, K = 5). K-1 folds are  
371 used to obtain the balance (with *th.imp* = 0 as the stop rule) and the remaining fold is used  
372 to test the result. The process is repeated M times (default value, M = 10)

373

374 **Optimal number of components**

375

376 For each combination of K and M we perform the *selbal* function on the training dataset  
377 and find the optimal balance with  $c$  components,  $c \in \{2, \dots, C\}$  (default value,  $C = 20$ ) and  
378 evaluate the mean squared error (MSE) of the model on the test dataset. For each  $c$  we  
379 obtain  $\overline{MSE}_c$ , the mean MSE of the different models with  $c$  components and the  
380 corresponding standard error. The optimal number of components is defined with the 1se  
381 rule, as the minimum number of components whose mean MSE is below the minimum  $\overline{MSE}$   
382 plus its standard error.

383

384 For dichotomous components, the MSE is computed in the same way codifying the two  
385 groups as 0 and 1.

386

387 **Robustness of the result**

388

389 Once the optimal number of components  $k_{opt}$  has been chosen, all the balances obtained  
390 in the cv procedure are reduced to  $k_{opt}$  components. Then, a frequency table is built both  
391 for balances and for individual components. This information, available in the output of  
392 *selbal.cv*, is summarized in a table as those shown in Figure 3, Figure 6 and Figure 9.

393

394 The cv process also provides the association or discrimination value for each balance in the  
395 cv which can be used as a more accurate measure of association or discrimination of the  
396 global model.

397

398

399 **BIBLIOGRAPHY**

- 400 1. Arumugam M, Raes J, Pelletier E, Paslier D, Yamada T, Mende DR, et al. Enterotypes  
401 of the human gut microbiome. *Nature* [Internet]. 2011 May 12 [cited 2014 Jul  
402 9];473(7346):174–80. Available from:  
403 [http://eutils.ncbi.nlm.nih.gov/entrez/eutils/elink.fcgi?dbfrom=pubmed&id=215089](http://eutils.ncbi.nlm.nih.gov/entrez/eutils/elink.fcgi?dbfrom=pubmed&id=21508958&retmode=ref&cmd=prlinks)  
404 [58&retmode=ref&cmd=prlinks](http://eutils.ncbi.nlm.nih.gov/entrez/eutils/elink.fcgi?dbfrom=pubmed&id=21508958&retmode=ref&cmd=prlinks)
- 405 2. Turnbaugh PJ, Ley RE, Hamady M, Fraser-Liggett CM, Knight R, Gordon JI. The  
406 human microbiome project. *Nature* [Internet]. 2007 Oct 18 [cited 2014 Jul  
407 10];449(7164):804–10. Available from:  
408 [http://www.pubmedcentral.nih.gov/articlerender.fcgi?artid=3709439&tool=pmcen](http://www.pubmedcentral.nih.gov/articlerender.fcgi?artid=3709439&tool=pmcentrez&rendertype=abstract)  
409 [trez&rendertype=abstract](http://www.pubmedcentral.nih.gov/articlerender.fcgi?artid=3709439&tool=pmcentrez&rendertype=abstract)
- 410 3. Santiago A, Panda S, Mengels G, Martinez X, Azpiroz F, Dore J, et al. Processing  
411 faecal samples: a step forward for standards in microbial community analysis. *BMC*  
412 *Microbiol* [Internet]. 2014 Jan [cited 2015 Aug 8];14(1):112. Available from:  
413 <http://www.biomedcentral.com/1471-2180/14/112>
- 414 4. McMurdie PJ, Holmes S. Waste Not, Want Not: Why Rarefying Microbiome Data Is  
415 Inadmissible. *PLoS Comput Biol*. 2014;10(4).
- 416 5. Dillies MA, Rau A, Aubert J, Hennequet-Antier C, Jeanmougin M, Servant N, et al. A  
417 comprehensive evaluation of normalization methods for Illumina high-throughput  
418 RNA sequencing data analysis. *Brief Bioinform*. 2013;14(6):671–83.
- 419 6. Pearson K. *Mathematical Contributions to the Theory of Evolution* . --On a Form of

- 420 Spurious Correlation Which May Arise When Indices Are Used in the Measurement  
421 of Organs. 1896;
- 422 7. Gloor GB, Wu JR, Pawlowsky-Glahn V, Egozcue JJ. It's all relative: analyzing  
423 microbiome data as compositions. *Ann Epidemiol* [Internet]. 2016;26(5):322–9.  
424 Available from: <http://dx.doi.org/10.1016/j.annepidem.2016.03.003>
- 425 8. Weiss S, Xu ZZ, Peddada S, Amir A, Bittinger K, Gonzalez A, et al. Normalization and  
426 microbial differential abundance strategies depend upon data characteristics.  
427 *Microbiome* [Internet]. 2017;5(1):27. Available from:  
428 <http://microbiomejournal.biomedcentral.com/articles/10.1186/s40168-017-0237-y>
- 429 9. Pawlowsky-Glahn V, Egozcue JJ, Tolosana-Delgado R. Modeling and Analysis of  
430 Compositional Data. 2015. 272 p.
- 431 10. Martín-Fernández JA, Hron K, Templ M, Filzmoser P, Palarea-Albaladejo J. Bayesian-  
432 multiplicative treatment of count zeros in compositional data sets. *Stat Modelling*.  
433 2015;15(2):134–58.
- 434 11. Mandal S, Treuren W Van, White RA, Eggesbø M, Knight R, Peddada SD. Analysis of  
435 composition of microbiomes: a novel method for studying microbial composition.  
436 2015;1:1–7.
- 437 12. Cao KL, Costello M, Lakis VA, Bartolo F. MixMC : A Multivariate Statistical  
438 Framework to Gain Insight into Microbial Communities. 2016;
- 439 13. Egozcue JJ, Pawlowsky-Glahn V, Mateu-Figueras G, Barceló-Vidal C. Isometric  
440 Logratio Transformations for Compositional Data Analysis. *Math Geol*.  
441 2003;35(3):279–300.

- 442 14. Fernandes AD, Reid JN, Macklaim JM, McMurrough TA, Edgell DR, Gloor GB.  
443 Unifying the analysis of high-throughput sequencing datasets: characterizing RNA-  
444 seq, 16S rRNA gene sequencing and selective growth experiments by compositional  
445 data analysis. *Microbiome* [Internet]. 2014;2:15. Available from:  
446 [http://www.pubmedcentral.nih.gov/articlerender.fcgi?artid=4030730&tool=pmcen](http://www.pubmedcentral.nih.gov/articlerender.fcgi?artid=4030730&tool=pmcentrez&rendertype=abstract)  
447 [trez&rendertype=abstract](http://www.pubmedcentral.nih.gov/articlerender.fcgi?artid=4030730&tool=pmcentrez&rendertype=abstract)
- 448 15. Morton JT, Sanders J, Quinn RA, McDonald D, Gonzalez A, Vázquez-baeza Y, et al.  
449 *crossm Differentiation*. 2017;2(1):1–11.
- 450 16. Washburne AD, Silverman JD, Leff JW, Bennett DJ, Darcy JL, Mukherjee S, et al.  
451 Phylogenetic factorization of compositional data yields lineage-level associations in  
452 microbiome datasets. *PeerJ* [Internet]. 2017;5:e2969. Available from:  
453 <https://peerj.com/articles/2969>
- 454 17. Noguera-Julian M, Rocafort M, Guillén Y, Rivera J, Casadellà M, Nowak P, et al. Gut  
455 Microbiota Linked to Sexual Preference and HIV Infection. *EBioMedicine* [Internet].  
456 2016;5:135–46. Available from: <http://dx.doi.org/10.1016/j.ebiom.2016.01.032>
- 457 18. Ren B, Schwager E, Knights D, Song SJ, Yassour M, Haberman Y, et al. The  
458 treatment-naïve microbiome in new-onset Crohn ' s disease. 2015;15(3):382–92.
- 459 19. Øyri SF, Muzes G, Sipos F. Dysbiotic gut microbiome: A key element of Crohn's  
460 disease. Vol. 43, *Comparative Immunology, Microbiology and Infectious Diseases*.  
461 2015. p. 36–49.
- 462 20. Mittlböck M, Schemper M. Explained variation for logistic regression. *Stat Med*.  
463 1996;15(19):1987–97.

- 464 21. Tjur T. Coefficients of Determination in Logistic Regression Models—A New  
465 Proposal: The Coefficient of Discrimination. *Am Stat.* 2009;63(4):366–72.
- 466 22. Martín-Fernández J, Barceló-Vidal C, Pawlowsky-Glahn V. Dealing with Zeros and  
467 Missing Values in Compositional Data Sets Using Nonparametric Imputation. *Math*  
468 *Geol.* 2003;35(3):253–78.
- 469
- 470



471

472 **Figure 1:** Mean squared error (MSE) as a function of the number of components included  
473 in the balance. The optimal number of components is highlighted with a vertical dashed  
474 line.

475

476 **Figure 2:** The components defining the selected balance are specified on top of the boxplot  
477 that represents the distribution of the balance score for each of the groups. The right part  
478 of the figure contains the ROC-curve with its AUC value (0.786) and the density curve for  
479 each group.

480

481 **Figure 3:** Cross-validation (cv) results: first column contains the names of the taxa  
482 appearing in the most frequently selected balances in the cv procedure, the second column  
483 provides the frequency of selection (in percentage), the third column corresponds to the  
484 global balance, that is, the balance obtained using all the samples. Columns 4 to 6 represent  
485 the most frequent balances identified in the cv procedure. Colored rectangles indicate if the  
486 component is in the numerator of the balance (*red*), in the denominator (*blue*) or not  
487 included (*white*). The last row provides the proportion of times the balance has been  
488 selected as optimal in the cv procedure.

489

490 **Figure 4:** Mean squared error (MSE) as a function of the number of components included  
491 in the balance. The optimal number of components is highlighted with a vertical dashed  
492 line.

493

494 **Figure 5.** Representation of the balance obtained (*X* axis) for the sCD14 immune-marker  
495 values (*Y* axis), the bacteria groups composing it (top of the figure) and the corresponding  
496 regression line (*blue*).

497

498 **Figure 6:** Cross – validation (cv) results: first column contains the names of the taxa  
499 included in the most frequently selected balances in the cv procedure, the second column  
500 provides the frequency of selection (in percentage), the third column corresponds to the  
501 global balance, that is, the balance obtained using the whole sample. Columns 4 to 6  
502 represent the most frequent balances identified in the cv procedure. Colored rectangles  
503 indicate if the component is in the numerator of the balance (*red*), in the denominator  
504 (*blue*) or not included (*white*). The last row provides the proportion of times the balance  
505 has been the selected in the cv procedure.

506 **Figure 7:** Mean squared error (MSE) as a function of the number of components included  
507 in the balance. The optimal number of components is highlighted with a vertical dashed  
508 line.

509

510 **Figure 8:** The components defining the selected balance are specified on top of the boxplot  
511 which represents the distribution of the balance score for each of the groups. The right part  
512 of the figure contains the ROC – curve with its AUC value (0.838) and the density curve for  
513 each group.

514

515 **Figure 9:** Cross – validation (cv) results: first column contains the names of the taxa  
516 appearing in the most frequently selected balances in the cv procedure, the second column  
517 provides the frequency of selection (in percentage), the third column corresponds to the  
518 global balance, that is, the balance obtained using the whole sample. Columns 4 to 6  
519 represent the most frequent balances identified in the cv procedure. Colored rectangles  
520 indicate if the component is in the numerator of the balance (*red*), in the denominator (*blue*)  
521 or not included (*white*). The last row provides the proportion of times the balance has been  
522 the selected in the cv procedure.  
523

# Figure 1

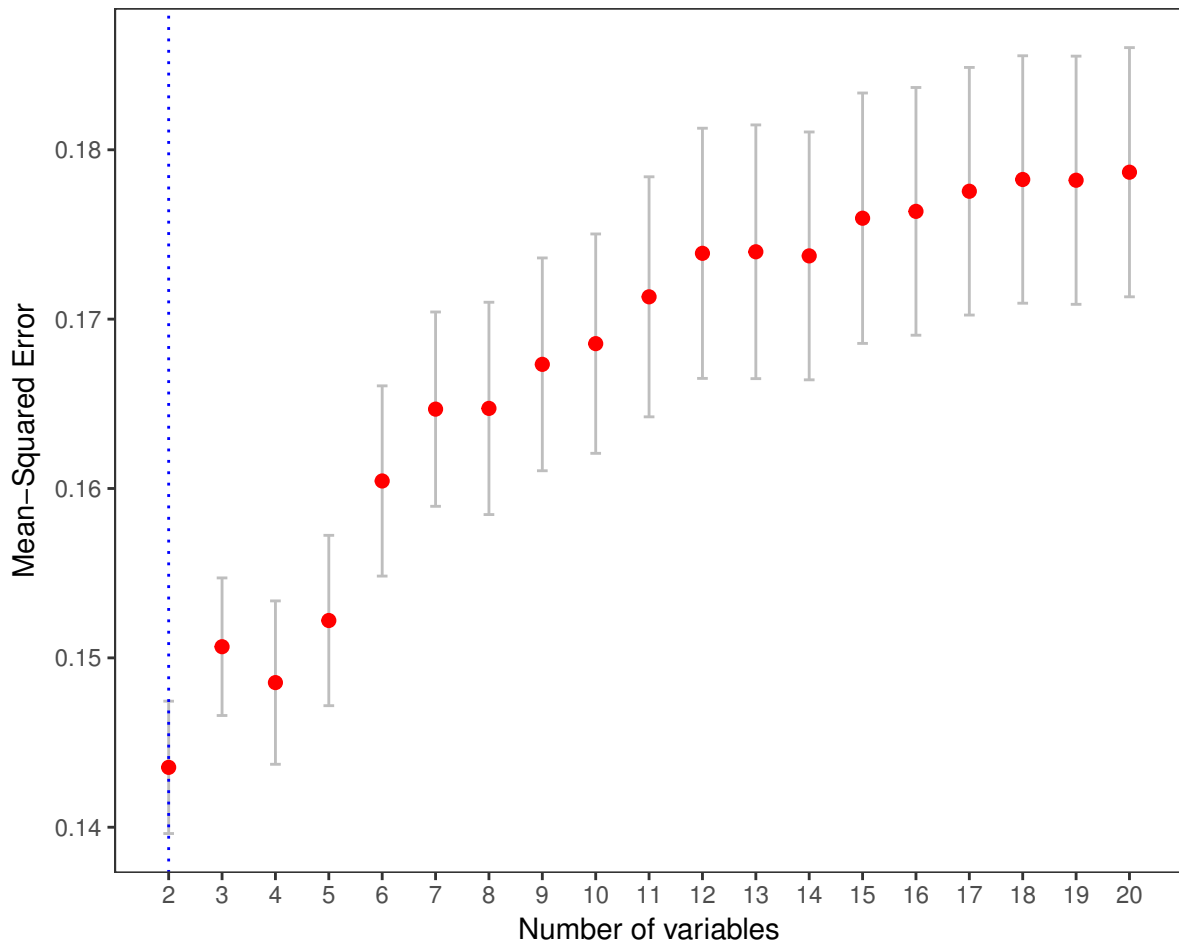

# Figure 2

DENOMINATOR

NUMERATOR

f\_Ruminococcaceae\_g\_Incertae\_Sedis

f\_Erysipelotrichaceae\_g\_unclassified

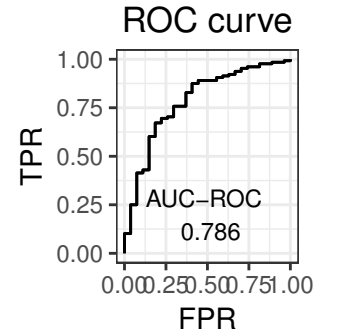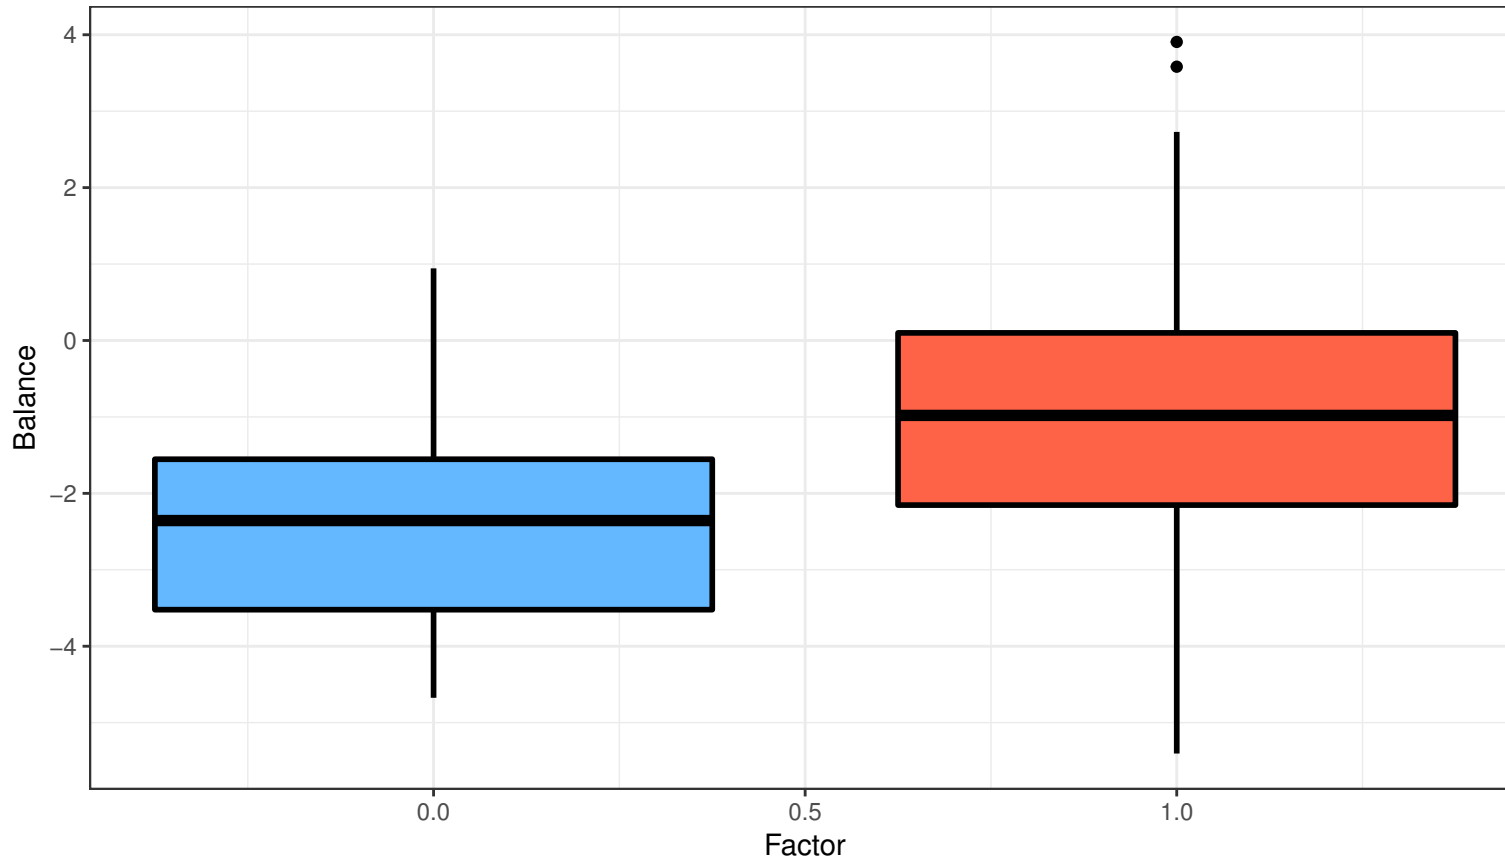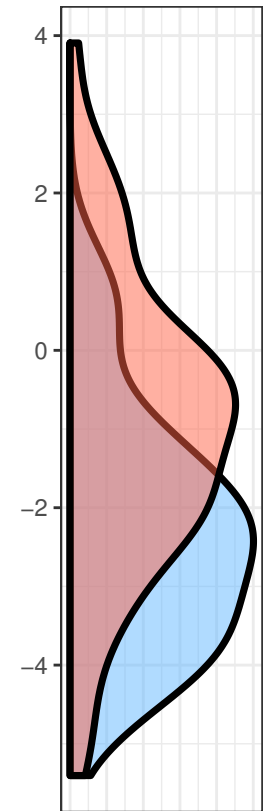

Figure 3

|                                             | %         | Global   | BAL 1       | BAL 2       | BAL 3       |
|---------------------------------------------|-----------|----------|-------------|-------------|-------------|
| <b>f_Ruminococcaceae_g_Incertae_Sedis</b>   | <b>76</b> |          |             |             |             |
| <b>f_Erysipelotrichaceae_g_unclassified</b> | <b>50</b> |          |             |             |             |
| <b>g_Bacteroides</b>                        | <b>30</b> |          |             |             |             |
| <b>g_Phascalactobacterium</b>               | <b>12</b> |          |             |             |             |
| <b>FREQ</b>                                 | <b>-</b>  | <b>-</b> | <b>0.44</b> | <b>0.24</b> | <b>0.06</b> |

# Figure 4

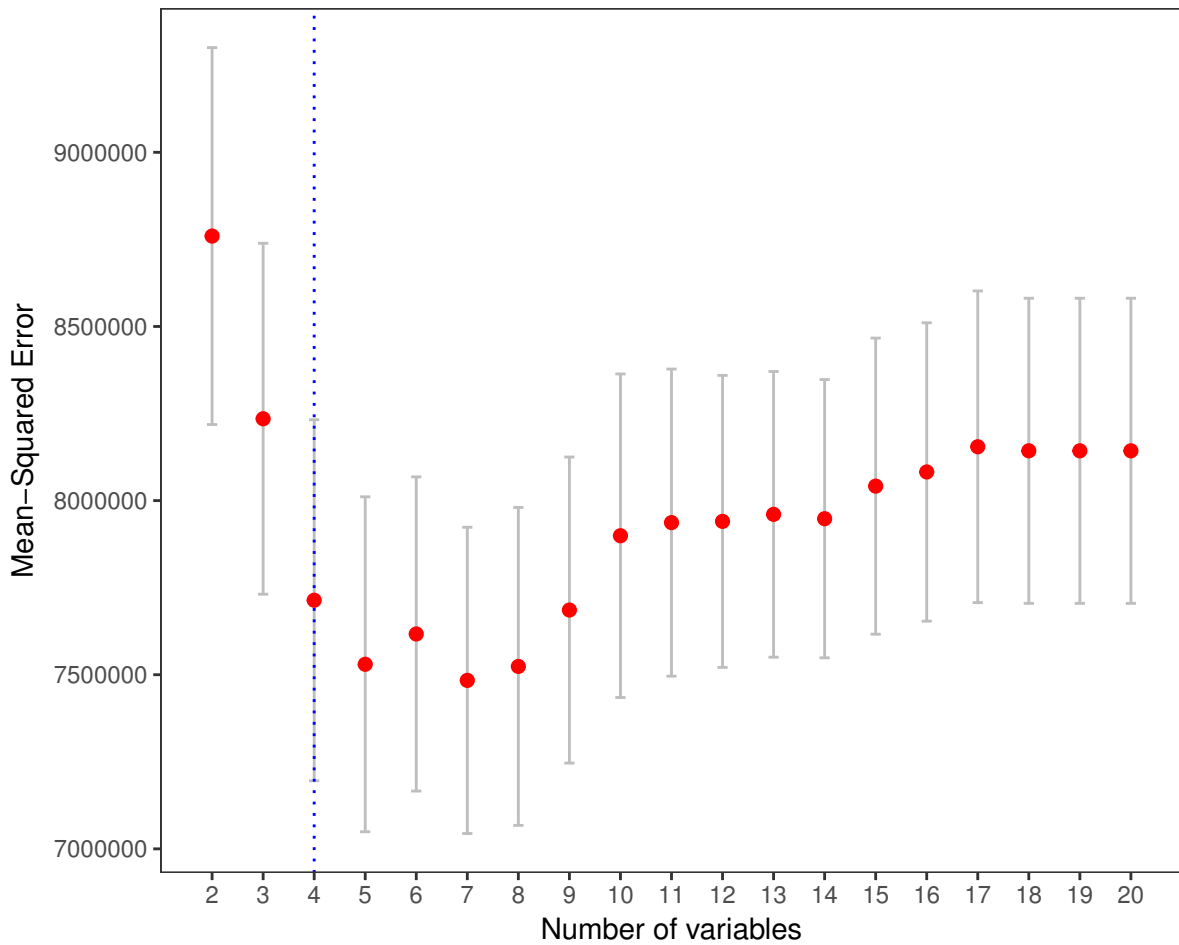

# Figure 5

DENOMINATOR

NUMERATOR

f\_Lachnospiraceae\_g\_unclassified

g\_Subdoligranulum

g\_Collinsella

f\_Lachnospiraceae\_g\_Incertae\_Sedis

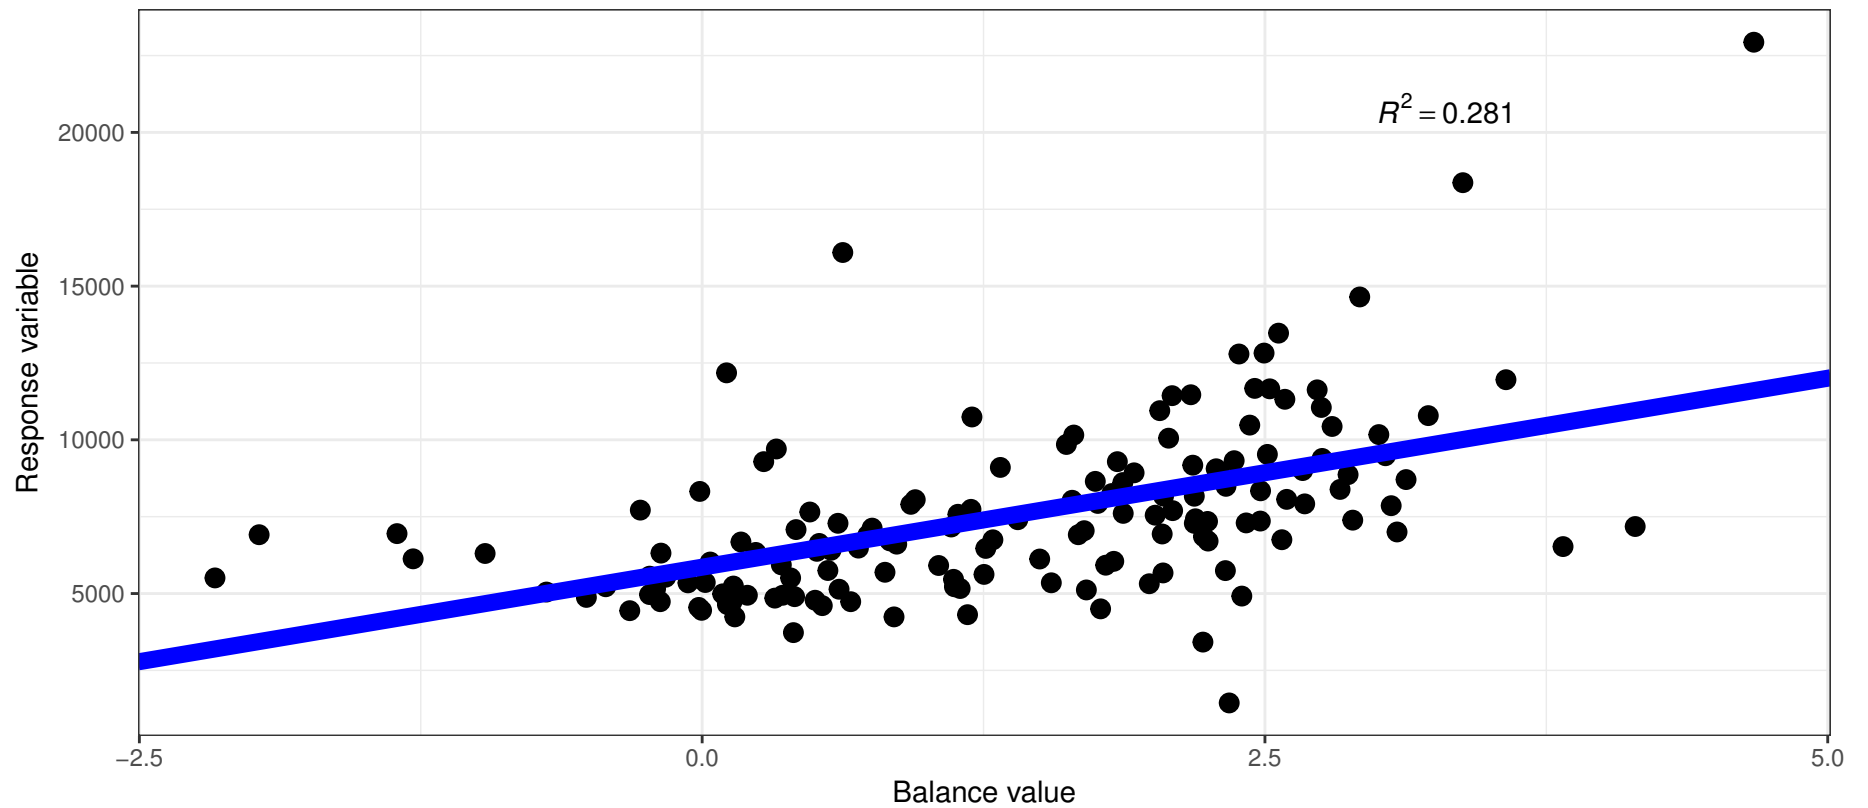



# Figure 6

|                                    | %  | Global | BAL 1       | BAL 2       | BAL 3       |
|------------------------------------|----|--------|-------------|-------------|-------------|
| f_Lachnospiraceae_g_unclassified   | 94 |        |             |             |             |
| g_Collinsella                      | 76 |        |             |             |             |
| g_Subdoligranulum                  | 72 |        |             |             |             |
| f_Lachnospiraceae_g_Incertae_Sedis | 54 |        |             |             |             |
| g_Thalassospira                    | 50 |        |             |             |             |
| g_Bifidobacterium                  | 14 |        |             |             |             |
| <b>FREQ</b>                        | –  | –      | <b>0.34</b> | <b>0.12</b> | <b>0.08</b> |

Figure 7

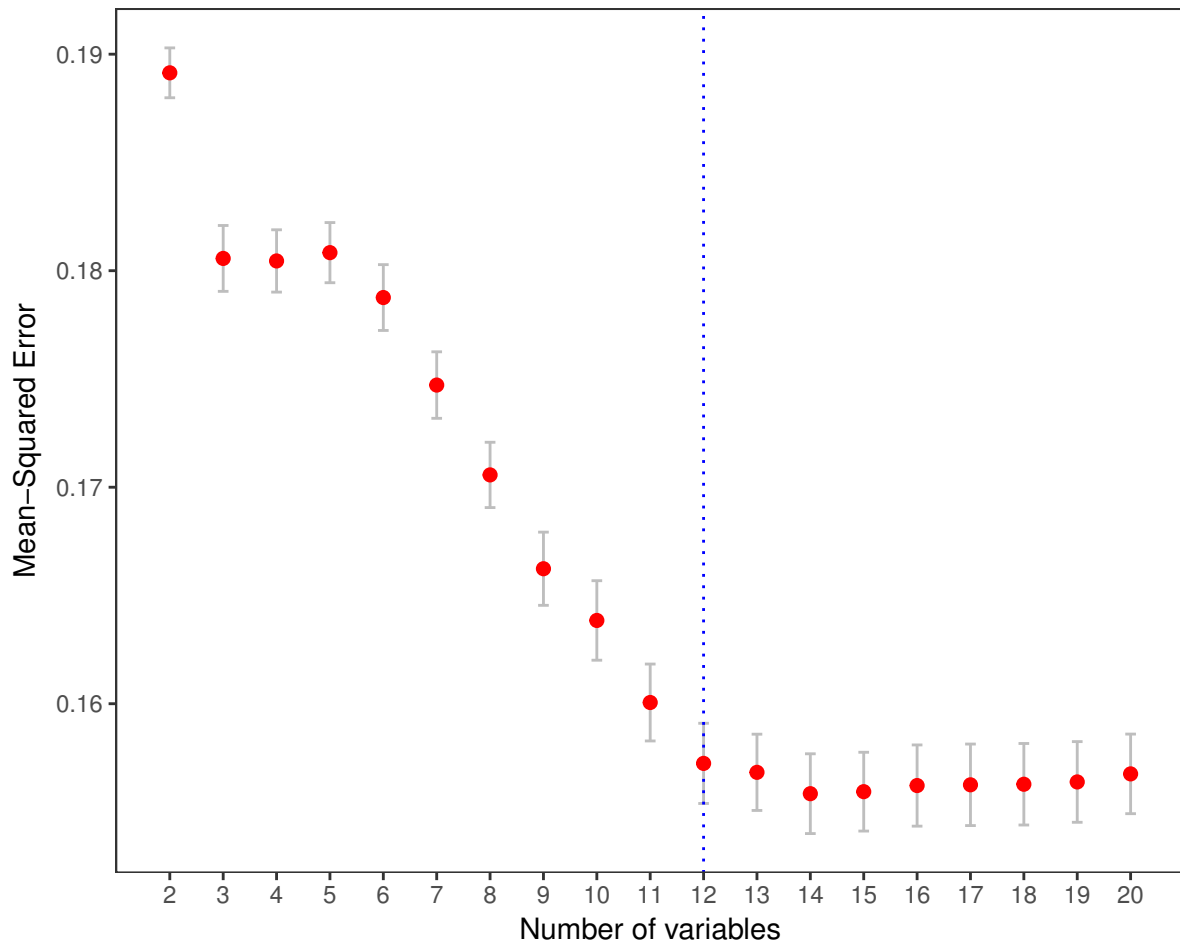

# Figure 8

**DENOMINATOR**  
g\_\_Roseburia  
o\_\_Clostridiales\_g\_\_  
g\_\_Bacteroides  
f\_\_Peptostreptococcaceae\_g\_\_

**NUMERATOR**  
g\_\_Streptococcus  
g\_\_Dialister  
g\_\_Adlercreutzia  
g\_\_Dorea  
g\_\_Oscillospira  
o\_\_Lactobacillales\_g\_\_  
g\_\_Aggregatibacter  
g\_\_Eggerthella

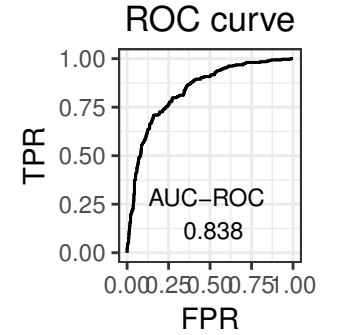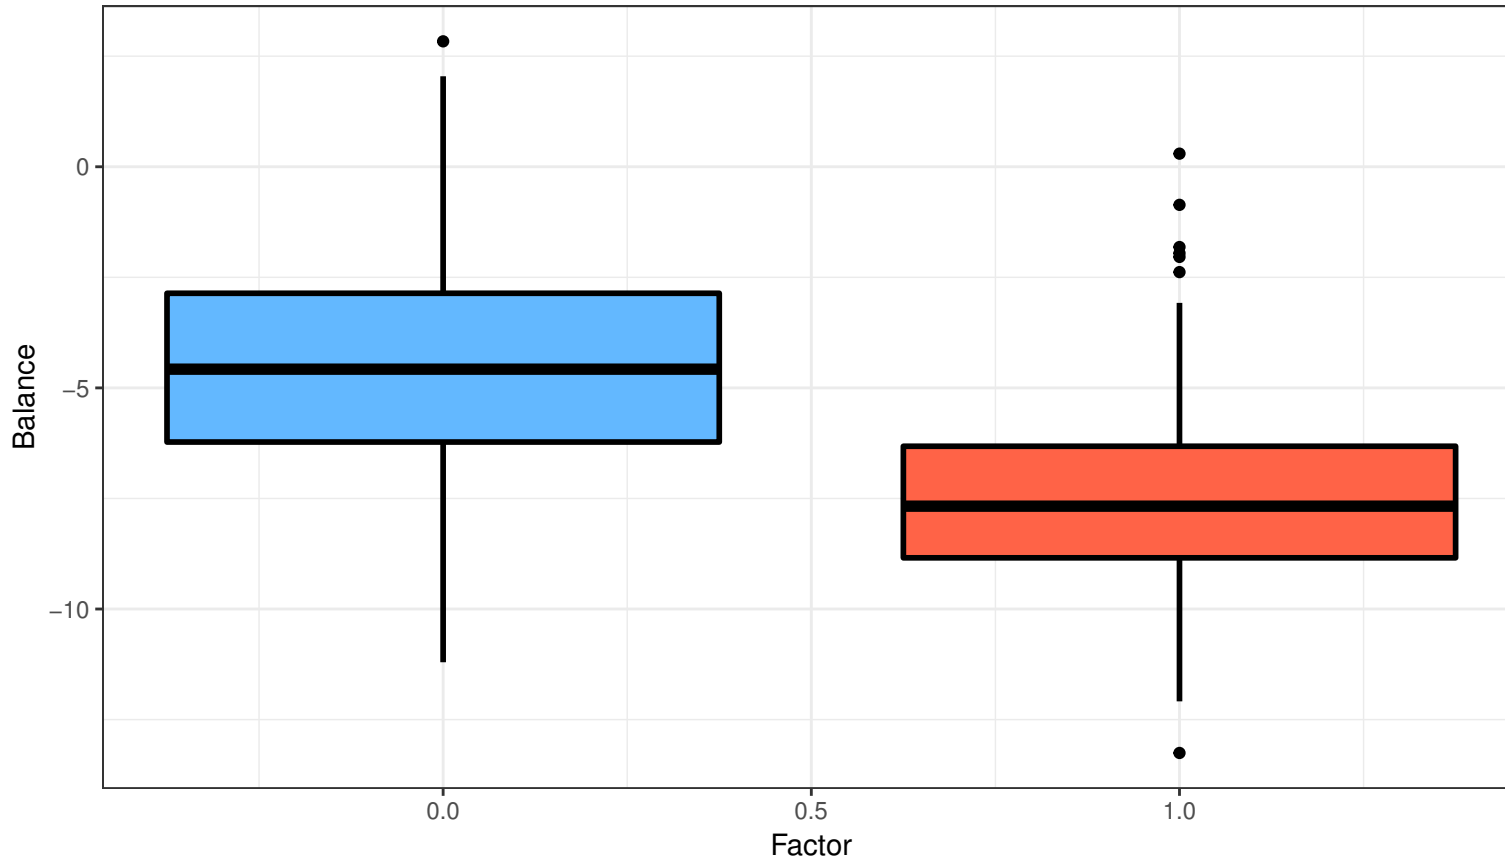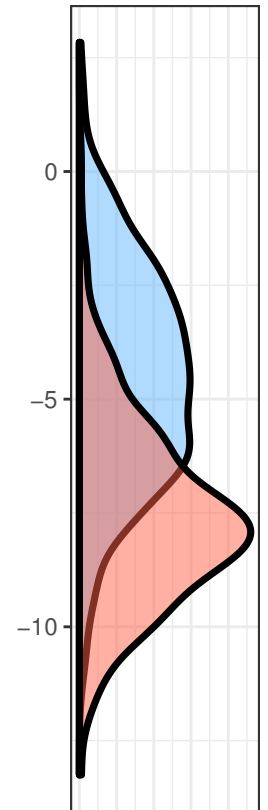

# Figure 9

|                              | %        | Global   | BAL 1       | BAL 2      | BAL 3      |
|------------------------------|----------|----------|-------------|------------|------------|
| g__Dialister                 | 100      |          |             |            |            |
| g__Roseburia                 | 100      |          |             |            |            |
| o__Clostridiales_g__         | 98       |          |             |            |            |
| g__Bacteroides               | 98       |          |             |            |            |
| g__Dorea                     | 96       |          |             |            |            |
| o__Lactobacillales_g__       | 94       |          |             |            |            |
| g__Eggerthella               | 92       |          |             |            |            |
| g__Aggregatibacter           | 92       |          |             |            |            |
| g__Adlercreutzia             | 90       |          |             |            |            |
| f__Peptostreptococcaceae_g__ | 86       |          |             |            |            |
| g__Streptococcus             | 76       |          |             |            |            |
| g__Oscillospira              | 72       |          |             |            |            |
| g__Actinomyces               | 26       |          |             |            |            |
| g__Blautia                   | 24       |          |             |            |            |
| <b>FREQ</b>                  | <b>-</b> | <b>-</b> | <b>0.36</b> | <b>0.1</b> | <b>0.1</b> |
